# Supplementary material for: Electrocardiographic Abnormalities and QTc Interval in Patients Undergoing Hemodialysis
Source: PubMed Central journal article supplement (PMC4865146; doi:10.1371/journal.pone.0155445), 2016-05-12
Supplement: pone.0155445.s001.pdf [file pone.0155445.s001.pdf]

## 伦理委员会批准函

Approval Letter of Ethics Committee

审查编号 Approval No.: **B2013-139**

审查日期 Date of Review: **2013年12月26日**

|                                                                                                                                                                                                                                                                                                                                                                                                                                                                                                                    |                                                                                                                       |                                                                                                            |                                                                                       |                               |    |
|--------------------------------------------------------------------------------------------------------------------------------------------------------------------------------------------------------------------------------------------------------------------------------------------------------------------------------------------------------------------------------------------------------------------------------------------------------------------------------------------------------------------|-----------------------------------------------------------------------------------------------------------------------|------------------------------------------------------------------------------------------------------------|---------------------------------------------------------------------------------------|-------------------------------|----|
| <b>项目名称</b><br>Study Title                                                                                                                                                                                                                                                                                                                                                                                                                                                                                         | 维持性血液透析患者心电图异常情况 & QT 间期改变<br>Electrocardiographic abnormalities and QTc interval in patients undergoing hemodialysis |                                                                                                            |                                                                                       |                               |    |
| <b>试验产品名称</b><br>Study Product Name                                                                                                                                                                                                                                                                                                                                                                                                                                                                                | NA                                                                                                                    | <b>产品类别/型号</b><br>Product Category                                                                         | NA                                                                                    | <b>研究分期</b><br>Phase of Study | NA |
| <b>批准文号及发文单位</b> (Approval No. and Issued By):<br>NA                                                                                                                                                                                                                                                                                                                                                                                                                                                               |                                                                                                                       |                                                                                                            | <b>药检报告及批号</b> (Certificate of Analysis and Batch No.): NA                            |                               |    |
| <b>主要研究者</b> (Principal Investigator):<br>丁小强                                                                                                                                                                                                                                                                                                                                                                                                                                                                      |                                                                                                                       |                                                                                                            | <b>申办者</b> (Sponsor):<br>复旦大学附属中山医院                                                   |                               |    |
| <b>审查方式</b> (Type of Review)                                                                                                                                                                                                                                                                                                                                                                                                                                                                                       |                                                                                                                       | <input checked="" type="checkbox"/> 会议审查 (Meeting Review) <input type="checkbox"/> 快速审查 (Expedited Review) |                                                                                       |                               |    |
| <b>会议地点</b> (Meeting Location)                                                                                                                                                                                                                                                                                                                                                                                                                                                                                     |                                                                                                                       | 复旦大学附属中山医院 5 号楼 507 会议室                                                                                    |                                                                                       |                               |    |
| <b>会议出席情况</b><br>(Meeting Attendance)                                                                                                                                                                                                                                                                                                                                                                                                                                                                              |                                                                                                                       | 出席 (Attendance) <u>8</u> 人, 投票 (Vote) <u>8</u> 人, 回避 (Avoidance) <u>0</u> 人 (      )                       |                                                                                       |                               |    |
| 下面划[√]的研究相关文件已经审阅<br>The following items[√] have been reviewed in connection with the above study to be conducted by the above investigator<br><input checked="" type="checkbox"/> 研究方案及日期 Protocol No., dated and version: v1.0, 2013.11.13<br><input checked="" type="checkbox"/> 受试者知情同意书及日期 Consent Form(s) dated and version: v1.0, 2013.11.13<br><input type="checkbox"/> 受试者招募广告及日期 Advertisements for Recruitment dated:<br><input checked="" type="checkbox"/> 其他(请具体列出) Other(specify): 主要研究者简历; 参加人员名单。 |                                                                                                                       |                                                                                                            |                                                                                       |                               |    |
| <b>审查决定</b> Decision for this proposal and have been [√]:                                                                                                                                                                                                                                                                                                                                                                                                                                                          |                                                                                                                       |                                                                                                            |                                                                                       |                               |    |
| <input checked="" type="checkbox"/> 同意 Approval                                                                                                                                                                                                                                                                                                                                                                                                                                                                    |                                                                                                                       |                                                                                                            |                                                                                       |                               |    |
| 持续审查频率: <input type="checkbox"/> 3 个月/3 months <input type="checkbox"/> 6 个月/6 months <input checked="" type="checkbox"/> 1 年/1 year <input type="checkbox"/> 不适用/NA                                                                                                                                                                                                                                                                                                                                               |                                                                                                                       |                                                                                                            |                                                                                       |                               |    |
| 主任委员/副主任委员签名:                                                                                                                                                                                                                                                                                                                                                                                                                                                                                                      |                                                                                                                       |                                                                                                            |  |                               |    |
| 批准日期:                                                                                                                                                                                                                                                                                                                                                                                                                                                                                                              |                                                                                                                       |                                                                                                            | 2013.12.20                                                                            |                               |    |
| 复旦大学附属中山医院伦理委员会 (盖章)                                                                                                                                                                                                                                                                                                                                                                                                                                                                                               |                                                                                                                       |                                                                                                            |                                                                                       |                               |    |
|                                                                                                                                                                                                                                                                                                                                                                                                                               |                                                                                                                       |                                                                                                            |                                                                                       |                               |    |

注: 本批件有效期为一年, 逾期未实施的, 则自行废止。

联系方式: 上海市枫林路 180 号, 黄锦培/杨梦婕, 电话/传真: 64041990-3257

## 声明

1. 复旦大学附属中山医院伦理委员会（以下简称本伦理委员会）的职责、人员组成、操作规范和记录遵循 ICH-GCP 及中华人民共和国食品药品监督管理局颁布的《药品临床试验质量管理规范（GCP）》和《药物临床试验伦理审查工作指导原则》，并遵守中国相关法律和法规的规定。
2. 研究应遵循已经由伦理委员会批准的方案执行，应符合赫尔辛基宣言和 CFDA/GCP 的原则。
3. 本批件可能与其他中心机构及其伦理审查委员会备案。如果对方案在贵机构的可行性（包括研究者的资格与经验、设备与条件等）有不同意见，请及时与本伦理委员会联系。
4. 研究过程中，对研究方案和知情同意书等相关文件所作的任何修改，均需得到伦理委员会审查同意后方可实施。
5. 在复旦大学附属中山医院发生的严重不良事件或严重非预期不良事件需在向 CFDA 上报的同时递交伦理委员会，国内其他中心发生的严重不良事件或严重非预期不良事件需每月汇总后递交伦理委员会，对于国外发生的严重非预期不良事件每个月汇总后递交伦理委员会，伦理委员会有权对其评估做出新的决定。
6. 本伦理委员会按照国家有关规定，对研究项目进行跟踪审查，自伦理委员会审查意见批复单批准之日起，请研究者在规定的持续审查日期到期或伦理委员会审查意见批复单失效前 1 个月递交持续审查申请，以获得伦理委员会的批准。
7. 暂停/提前终止临床试验，需及时通知本伦理委员会。
8. 方案违背和偏离需及时报告本伦理委员会。
9. 研究结束时，请向本伦理委员会递交结题报告和分中心小结表。
10. 研究中涉及采集生物标本的项目必须遵循本院的《生物标本应用暂行管理办法》，并在获得伦理批准后填写《生物标本应用申请表》。

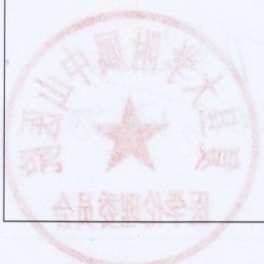

注：本批件有效期为一年，逾期未实施的，则自行废止。

联系方式：上海市枫林路 180 号，黄锦培/杨梦婕，电话/传真：64041990-3257

## 复旦大学附属中山医院 伦理委员会委员名单及出席情况

ETHICS COMMITTEE COMPOSITION AND ATTENDING

会议编号: 2013 年第 12 次会议

审查日期: Date of Review: 2013 年 12 月 26 日

| 委员姓名和职称<br>Member Name and Title |                                  | 职业<br>Occupation<br>(position) | 性别<br>Male/<br>Female | 工作单位<br>Working Place                        | 出席者签名<br>Signature of<br>Attending                                                    |
|----------------------------------|----------------------------------|--------------------------------|-----------------------|----------------------------------------------|---------------------------------------------------------------------------------------|
| 姓名                               | 职称/职务                            |                                |                       |                                              |                                                                                       |
| 王玉琦**<br>Wang Yuqi               | 教授<br>Professor                  | 医师<br>Surgeon                  | 男<br>male             | 中山医院<br>Zhong Shan<br>Hospital               |    |
| 秦新裕*<br>Qin Xinyu                | 教授<br>Professor                  | 医师<br>Surgeon                  | 男<br>male             | 中山医院<br>Zhong Shan<br>Hospital               |                                                                                       |
| 樊嘉*<br>Fan Jia                   | 教授<br>Professor                  | 医师<br>Surgeon                  | 男<br>male             | 中山医院<br>Zhong Shan<br>Hospital               |                                                                                       |
| 王吉耀<br>Wang Jiyao                | 教授<br>Professor                  | 医师<br>Physician                | 女<br>female           | 中山医院<br>Zhong Shan<br>Hospital               |    |
| 朱同玉<br>Zhu Tongyu                | 教授<br>Professor                  | 医师<br>Surgeon                  | 男<br>male             | 中山医院<br>Zhong Shan<br>Hospital               |                                                                                       |
| 刘康达<br>Liu Kangda                | 研究员<br>Researcher                | 医师<br>Physician                | 男<br>male             | 中山医院<br>Zhong Shan<br>Hospital               |  |
| 李海青<br>Li Haiqing                | 副科长<br>Vice Section<br>Chief     | 职员<br>Clerk                    | 男<br>male             | 中山医院<br>Zhong Shan<br>Hospital               |  |
| 衡慧珠<br>Heng Huizhu               | 居委会主任<br>Residents'<br>Committee | 群众代表<br>Layperson              | 女<br>female           | 枫林街道<br>Fenglin<br>Community                 |  |
| 李雪宁<br>Li Xuening                | 主任药师<br>Chief Pharmacist         | 药师<br>Pharmacist               | 女<br>female           | 中山医院<br>Zhong Shan<br>Hospital               |  |
| 张博恒<br>Zhang Boheng              | 主任医师<br>Chief<br>Physician       | 医师<br>Physician                | 男<br>male             | 中山医院<br>Zhong Shan<br>Hospital               |  |
| 孙元<br>Sun Yuan                   | 委员<br>Member                     | 律师<br>Lawyer                   | 男<br>male             | 上海管博律师事<br>务所<br>Shanghai Guanbo<br>Law Firm |  |

注: \*\* 主任委员 \* 副主任委员
